**Title: Role of ethnicity and socio-economic status (SES) in the presentation of retinoblastoma: findings from the UK**

**Authors:**

Rabia Bourkiza<sup>1</sup>, Phillippa Cumberland<sup>5</sup>, Hiranya Abeysekera<sup>6</sup>, Manoj Parulekar<sup>6</sup>, Mandeep S Sagoo<sup>1,4,7</sup>, Jugnoo Rahi<sup>2,3,4,5</sup>, M. Ashwin Reddy<sup>1,4,7\*</sup>

**Affiliations:**

<sup>1</sup> Moorfields Eye Hospital. 162 City Road, London EC1V 2PD, UK

<sup>2</sup> Great Ormond Street Institute of Child Health, University College London, 30 Guilford St, London WC1N 1EH

<sup>3</sup> Great Ormond Street Hospital NIHR Biomedical Research Centre, London, UK

<sup>4</sup> NIHR Biomedical Research Centre at Moorfields Eye Hospital and University College London Institute of Ophthalmology, London, UK

<sup>5</sup> Ulverscroft Vision Research Group, Great Ormond Street Institute Child Health UCL, London, UK

<sup>6</sup> Birmingham Children's Hospital. Steelhouse Lane, Birmingham B4 6NH, UK

<sup>7</sup> Barts Health NHS Trust. Whitechapel Rd, Whitechapel, London E1 1BB

**Corresponding author:**

E-mail: mashwinreddy@hotmail.com

**Contributorship:**

All authors contributed equally to this work.

1 **Abstract:**

2  
3  
4  
5  
6  
7  
8  
9  
10  
11  
12  
13  
14  
15  
16  
17  
18  
19  
20  
21  
22  
23  
24  
25  
26  
27  
28  
29  
30  
31  
32  
33  
34  
35  
36  
37  
38

**Purpose:** The aim of this study was to investigate if there was a relationship between ethnicity or socioeconomic status and the presentation of advanced non-familial retinoblastoma in the UK.

**Methods:** A cross sectional study based at the two centres providing retinoblastoma care in the UK. Non-familial cases of retinoblastoma (Rb) presenting between January 2006 and December 2011 were included. Data collected included: age at diagnosis , gender, child’s ethnicity, International Intraocular Retinoblastoma Classification (IIRC) stage with Groups D and E being considered advanced, laterality, treatment, and postcodes. Individual postcode (ZIP code) data was used to obtain the Index of Multiple Deprivation (IMD) score. A postal questionnaire was sent to participants’ parents to collect further, person-level, information on languages spoken and household socioeconomic position. Measures of severity of retinoblastoma also included: requirement for primary enucleation; the use of adjuvant chemotherapy; and mortality.

**Results:** 189 cases were analyzed. 98 (52%) male and 91 (48%) female. Median age at diagnosis was 16 months [IQR 8 – 34 months]. 153/189 (81%) of cases presented with advanced retinoblastoma; 75 (40%) group E, 78 (41%) group D. 134 (72%) of cases were treated with enucleation.

Multivariable analysis showed that older age at presentation was associated with enucleation and bilateral disease was associated with adjuvant chemotherapy. There was some indication that South Asian ethnicity and being in the most deprived IMD quintile were associated with a higher likelihood of presentation with advanced disease, but these estimates did not reach statistical significance.

**Conclusions:** In this first national UK study of patients with non-familial retinoblastoma, there was no evidence of an association of ethnicity or socio-economic status and the risk of presenting with advanced disease. This may reflect equality in access of health care in the UK. As a result, awareness campaigns should continue.

## 39 **Introduction**

40

41 Retinoblastoma (Rb) is the most common primary intraocular malignancy of childhood  
42 worldwide,<sup>1</sup> with approximately 50-60 new cases per year in the UK.

43 The International Intraocular Retinoblastoma Classification (IIRC) describes five groups of  
44 retinoblastoma (A to E),<sup>2</sup> which represent the continuum of disease progression. Whilst globe  
45 salvage with focal treatments and/or a form of chemotherapy occurs in more than 90% for  
46 Groups A to C,<sup>3</sup> the figure is just over 60% for group D eyes,<sup>4</sup> and group E eyes (the most  
47 advanced form) are often enucleated at presentation. Retinoblastoma surgeons often elect to  
48 enucleate as 39% of patients with Group E eyes require adjuvant chemotherapy to reduce the  
49 risk of metastases.<sup>5,6</sup> Thus, early diagnosis and prompt treatment is crucial for globe salvage,  
50 preservation of vision and reduced morbidity.

51 It is recognized that in resource poor countries increased lag time (time to diagnosis interval) is  
52 associated with increased mortality and extra-ocular Rb.<sup>7,8</sup> Recently, it has been demonstrated  
53 in the UK that increased lag time for children with Rb is not associated with an increased risk of  
54 adjuvant chemotherapy post-enucleation nor higher frequency of Group E eyes.<sup>9</sup>

55 Similarly, low socioeconomic status has been stated as an important factor in the development  
56 of advanced disease in resource poor countries.<sup>10</sup> In the United States, one study reported a  
57 trend for Hispanic children and children with no healthcare insurance to have more advanced  
58 disease although statistical significance was not achieved.<sup>11</sup>

59 In the UK, the National Health Service (NHS) aims to provide equal access to healthcare. We  
60 were keen to understand which ethnic or socioeconomic groups, if any, were presenting with  
61 advanced retinoblastoma leading to adverse outcomes including mortality, enucleation and  
62 adjuvant chemotherapy. Identification of specific groups would enable resources to be directed  
63 to these groups.

64

65

## 66 **Materials and Methods**

### 67 ***Study population and data collection***

68 This was a national multicenter, retrospective, non-comparative study evaluating non-familial  
69 retinoblastoma cases in the United Kingdom (UK).

70 Two centres in London and Birmingham provide the National Retinoblastoma service to the UK  
71 population in which all affected children are treated. The registries at these two centres, the  
72 Royal London Hospital, Barts Health NHS Trust and Birmingham Children's Hospital were  
73 reviewed and non-familial cases of Retinoblastoma presenting between 1st January 2006 and  
74 31st December 2011 were identified. This allowed a minimum of 5-year follow-up to investigate  
75 mortality. Only non-familial cases were included in this study as screening is already available  
76 for first degree relatives of patients with retinoblastoma. As such presentation of familial  
77 retinoblastoma is not initiated by these families. The study was approved by the National  
78 Research Ethics Committee (Reference 11/LO/0981). This research adhered to the tenets of  
79 the Declaration of Helsinki. Written parental consent was obtained for inclusion of participants in  
80 the study.

81 Data collected on all patients from electronic patient records included: age at diagnosis  
82 (months), gender, child's ethnicity, International Intraocular Retinoblastoma Classification (IIRC)  
83 stage at diagnosis<sup>2</sup>, laterality, treatment, and postcodes. In cases of bilateral disease, the stage  
84 of the worse eye was recorded. Individual postcode (ZIP code) data was used to obtain the  
85 Index of Multiple Deprivation (IMD) score, a relative deprivation score based on residential  
86 location.<sup>12</sup> Deprivation across 8414 geographical areas was assessed based on income,

87 employment, health, education, housing, access and child poverty. Higher scores of IMD  
88 indicate higher socioeconomic status.

89  
90 A postal questionnaire was also sent to participants' parents to collect further, person-level,  
91 information on languages spoken at home and household socioeconomic position, including  
92 housing tenure, main carer's educational qualifications and main wage-earner's employment  
93 status and occupation coded using the Standard Occupational Classification from the UK Office  
94 of National Statistics.<sup>13</sup>

95 Parents were contacted twice by mail and at least twice by telephone if they did not respond to  
96 maximize completion and return of the questionnaire.

97

### 98 ***Outcome measures***

99 Measures of severity of retinoblastoma included: IIRC stage (A to E) at diagnosis with Groups D  
100 and E being considered advanced; requirement for primary enucleation; the use of adjuvant  
101 chemotherapy dependent upon presence of high-risk features for systemic spread on  
102 histopathological evaluation i.e. massive choroidal invasion (>3mm),<sup>14</sup> retrolaminar optic nerve  
103 invasion or scleral invasion; and mortality.

104

### 105 ***Statistical methods***

106 Descriptive statistics are reported for the distribution of factors by severity of retinoblastoma,  
107 enucleation and adjuvant chemotherapy treatment. Multivariable logistic regression was used to  
108 model associations between the outcomes of interest and demographic and sociodemographic  
109 factors.

110

## 111 **Results**

112 **Study sample characteristics**

113 A total of 192 children with sporadic non-familial retinoblastoma presented in the UK over the  
114 six-year period of the study (1 January 2006 to 31 December 2011). Three cases were excluded  
115 from analysis. Two were due to incomplete data as they emigrated, and one declined consent.  
116 No child died during the study period, and no child died within 5 years from diagnosis. Thus, 189  
117 cases were available for the present study: 98 (52%) male and 91 (48%) female. (Table 1)  
118 Median age at diagnosis was 16 months [IQR 8 – 34 months], range 1 month to 12 years and 2  
119 months; 117 (62%) of cases presented in the first two years of life. There were 59 bilateral and  
120 130 unilateral cases (67 right eye, and 63 left eye). Left eyes were the worst affected eye in  
121 bilateral cases, compared to right eyes (47% left eye vs 32% right eye); this difference was not  
122 statistically significant.

123  
124 Overall, 153/189 (81%) of non-familial retinoblastoma cases presented with advanced  
125 retinoblastoma (IIRC groups D and E); 75 (40%) group E, 78 (41%) group D, 24 (13%) group C,  
126 11 (6%) group B and 1 group A. The child with an IIRC A grade was detected by an optometrist  
127 on routine assessment. The majority, 134 (72%), of cases were treated with enucleation, 124  
128 (93%) of whom had advanced disease. Those presenting with advanced retinoblastoma and  
129 those treated with enucleation were similarly distributed by demographic and socioeconomic  
130 factors to all cases (Table 1), as were those receiving adjuvant chemotherapy (68, 50% of those  
131 that were enucleated).

132  
133 Multivariable analysis showed children 2 years or older and those with bilateral retinoblastoma  
134 were more likely to present with advanced disease (Table 2). Older age at presentation was  
135 associated with enucleation and bilateral disease with receipt of adjuvant chemotherapy. There  
136 was some indication that Indian/Pakistani/Bangladeshi ethnicity and being in the lowest (most

137 deprived) IMD quintile were also associated with a higher likelihood of presentation with  
 138 advanced disease, but these estimates did not reach statistical significance.

139

140 Table 1: Distribution of demographic and clinical factors for all cases (N=189), by severity and  
 141 treatment.

|                                  | Total<br>N = 189 |    | Advanced IIRC<br>groups (D&E)<br>N = 153 (81%) |    | Enucleation<br>N = 134 (71%) |    | Adjuvant<br>chemotherapy<br>N = 68/134 (50%) |    |
|----------------------------------|------------------|----|------------------------------------------------|----|------------------------------|----|----------------------------------------------|----|
|                                  | n                | %  | n                                              | %  | n                            | %  | n                                            | %  |
| <b>Gender</b>                    |                  |    |                                                |    |                              |    |                                              |    |
| Female                           | 91               | 48 | 73                                             | 48 | 64                           | 48 | 36                                           | 53 |
| Male                             | 98               | 52 | 80                                             | 52 | 70                           | 52 | 32                                           | 47 |
| <b>Ethnicity</b>                 |                  |    |                                                |    |                              |    |                                              |    |
| English/Scottish/Welsh           | 140              | 74 | 110                                            | 72 | 98                           | 74 | 54                                           | 79 |
| Indian/Pakistani/<br>Bangladeshi | 23               | 12 | 21                                             | 14 | 18                           | 14 | 9                                            | 13 |
| Black<br>Caribbean/African       | 8                | 4  | 6                                              | 4  | 4                            | 3  | 1                                            | 1  |
| Mixed White                      | 11               | 6  | 9                                              | 6  | 8                            | 6  | 1                                            | 1  |
| Other White                      | 3                | 2  | 3                                              | 2  | 3                            | 2  | 1                                            | 1  |
| Other                            | 3                | 2  | 3                                              | 2  | 2                            | 1  | 2                                            | 3  |
| <b>IMD score (quintiles)</b>     |                  |    |                                                |    |                              |    |                                              |    |
| 1 (most deprived)                | 39               | 21 | 34                                             | 23 | 27                           | 20 | 14                                           | 21 |
| 2                                | 44               | 23 | 35                                             | 23 | 32                           | 24 | 17                                           | 25 |
| 3                                | 29               | 15 | 21                                             | 14 | 20                           | 15 | 11                                           | 16 |
| 4                                | 33               | 18 | 28                                             | 18 | 25                           | 19 | 12                                           | 18 |
| 5 (least deprived)               | 43               | 23 | 34                                             | 22 | 29                           | 22 | 13                                           | 19 |
| <b>Age at diagnosis</b>          |                  |    |                                                |    |                              |    |                                              |    |
| <1 yr                            | 71               | 37 | 52                                             | 34 | 41                           | 31 | 27                                           | 40 |
| 1 to <2 years                    | 46               | 24 | 35                                             | 23 | 31                           | 23 | 16                                           | 23 |
| 2 to <3 years                    | 32               | 17 | 29                                             | 19 | 28                           | 21 | 10                                           | 15 |
| 3 to <4 years                    | 27               | 14 | 24                                             | 16 | 21                           | 16 | 10                                           | 15 |
| 4 to 12 years                    | 13               | 6  | 13                                             | 8  | 13                           | 9  | 5                                            | 7  |
| <b>Laterality</b>                |                  |    |                                                |    |                              |    |                                              |    |
| Unilateral                       | 130              | 69 | 103                                            | 67 | 97                           | 72 | 35                                           | 51 |
| Bilateral                        | 59               | 31 | 50                                             | 33 | 37                           | 28 | 33                                           | 49 |

143 Table 2: Associations between advanced presentation retinoblastoma (grade D & E) and treatment, and demographic and  
 144 socioeconomic factors. (N = 189)

|                                  | Advanced IIRC grade<br>N = 153/189 (81%) |                          | Enucleation *<br>N = 134/189 (71%) |                        | Adjuvant chemotherapy *<br>N = 68/134 (50%) |                     |
|----------------------------------|------------------------------------------|--------------------------|------------------------------------|------------------------|---------------------------------------------|---------------------|
|                                  | Unadj OR                                 | Adj OR                   | Unadj OR                           | Adj OR                 | Unadj OR                                    | Adj OR              |
| <b>Gender</b>                    |                                          |                          |                                    |                        |                                             |                     |
| Female                           | 1                                        |                          | 1                                  | 1                      | 1                                           | 1                   |
| Male                             | 1.10                                     | 1.03 [0.46, 2.30]        | 1.01                               | 1.04 [0.47, 2.30]      | 0.68                                        | 0.50 [0.22, 1.17]   |
| <b>Ethnicity</b>                 |                                          |                          |                                    |                        |                                             |                     |
| English/Scottish/Welsh           | 1                                        | 1                        | 1                                  | 1                      | 1                                           | 1                   |
| Indian/Pakistani/<br>Bangladeshi | 2.86                                     | 3.13 [0.62, 16]          | 1.86                               | 1.40 [0.36, 5.41]      | 0.75                                        | 0.75 [0.22, 2.59]   |
| Black<br>Caribbean/African       | 0.82                                     | 0.59 [0.09, 3.72]        | 0.41                               | 0.16 [0.02, 1.18]      | 0.28                                        | 0.35 [0.03, 4.20]   |
| Mixed/Other White or<br>Other    | 2.05                                     | 3.92 [0.77, 20]          | 1.34                               | 0.93 [0.23, 3.76]      | 0.37                                        | 0.37 [0.09, 1.56]   |
| <b>IMD score (quintiles)</b>     |                                          |                          |                                    |                        |                                             |                     |
| 1 (most deprived)                | 1                                        | 1                        | 1                                  | 1                      | 1                                           | 1                   |
| 2                                | 0.57                                     | 0.61 [0.17, 2.15]        | 1.19                               | 1.90 [0.59, 6.17]      | 1.13                                        | 0.94 [0.28, 3.14]   |
| 3                                | 0.39                                     | 0.35 [0.09, 1.37]        | 1.11                               | 2.55 [0.63, 10]        | 1.22                                        | 1.03 [0.25, 4.28]   |
| 4                                | 0.82                                     | 0.79 [0.19, 3.39]        | 1.59                               | 1.99 [0.54, 7.37]      | 0.92                                        | 0.55 [0.15, 2.04]   |
| 5 (least deprived)               | 0.55                                     | 0.57 [0.16, 2.07]        | 0.99                               | 1.19 [0.36, 3.94]      | 0.81                                        | 0.66 [0.20, 2.25]   |
| <b>Age at diagnosis</b>          |                                          |                          |                                    |                        |                                             |                     |
| <1 yr                            | 1                                        | 1                        | 1                                  | 1                      | 1                                           | 1                   |
| 1 to <2 years                    | 1.16                                     | 1.58 [0.59, 4.25]        | 1.62                               | 1.39 [0.52, 3.74]      | 0.52                                        | 0.66 [0.19, 2.25]   |
| 2 to <3 years                    | 3.53                                     | <b>6.24 [1.50, 26]</b>   | 5.12                               | 3.58 [0.96, 13]        | 0.29                                        | 0.66 [0.19, 2.30]   |
| 3 to 12 years                    | 4.5                                      | <b>9.57 [2.34, 39]</b>   | 6.22                               | <b>4.30 [1.06, 17]</b> | 0.41                                        | 1.01 [0.31, 3.27]   |
| <b>Laterality</b>                |                                          |                          |                                    |                        |                                             |                     |
| Unilateral                       | 1                                        | 1                        | 1                                  | 1                      | 1                                           | 1                   |
| Bilateral                        | 1.46                                     | <b>3.24 [1.23, 8.57]</b> | 0.52                               | 0.48 [0.19, 1.20]      | 15                                          | <b>16 [4.8, 56]</b> |

145 Models adjusted for all factors in the table. \*Additional adjustment for IIRC groups



146 **Enhanced analysis of SES and Rb presentation (Questionnaire results)**

147 The response rate was 42 % (79 responses out of 189). IIRC groups D or E were less likely  
148 to respond (39 % responded) compared to group A-C (53 % responded); Odds Ratio 0.57  
149 [0.28, 1.20], which was not statistically significant.

150

151 Although there was a trend towards responding to the questionnaire with higher quantiles of  
152 IMD the results were not statistically significant ( $p = 0.06$ ). With regards to ethnicity,  
153 compared to English/Scottish/Welsh, mixed race participants were more likely to respond  
154 (OR 6.36 [1.33, 30]  $p = 0.021$ ). A summary of the questionnaire responses is presented in  
155 Table 3. There was no statistically significant association between language, employment  
156 status, social class, parental qualifications and accommodation tenure and outcomes  
157 (enucleation rate and adverse histopathology). Of note, there was no statistically significant  
158 association between the factors listed in Table 3 and advanced disease (IIRC Groups D and  
159 E).

160

161

162

163

164

165

166

167

168

169

170

171

172 Table 3: Distribution of household sociodemographic factors in subsample with enhanced  
 173 individual level data on SES, by IIRC grade, enucleation and adjuvant chemotherapy. \*Main  
 174 wage earner \*\* State examination at age 16 \*\*\* State examination at age 18

|                                            | N  | % D or E IIRC grade | % Enucleation | % Adjuvant chemotherapy |
|--------------------------------------------|----|---------------------|---------------|-------------------------|
| <b>Language spoken</b>                     |    |                     |               |                         |
| English only                               | 63 | 73.0                | 69.4          | 41.9                    |
| English and other language                 | 15 | 86.7                | 66.7          | 36.4                    |
| No English                                 | 1  | 100                 | 100           | 0                       |
|                                            |    | p=0.46              | p=0.78        | p=0.67                  |
| <b>Employment status*</b>                  |    |                     |               |                         |
| Student/unemployed                         | 5  | 100                 | 80.0          | 75                      |
| Employed                                   | 74 | 74.3                | 68.5          | 37.3                    |
|                                            |    | p=0.94              | p=0.59        | p=0.14                  |
| <b>Social class status*</b>                |    |                     |               |                         |
| Professional                               | 22 | 90.9                | 72.7          | 43.8                    |
| Skilled                                    | 28 | 60.7                | 64.3          | 42.1                    |
| Semi-skilled                               | 11 | 81.8                | 72.7          | 25.0                    |
| Manual                                     | 9  | 77.8                | 75.0          | 33.0                    |
|                                            |    | p=0.09              | p=0.89        | p=0.81                  |
| <b>Highest qualification of main carer</b> |    |                     |               |                         |
| None                                       | 8  | 87.5                | 75.0          | 33.3                    |
| O Level**                                  | 23 | 65.2                | 54.6          | 41.7                    |
| A Level***                                 | 16 | 68.8                | 81.3          | 30.8                    |
| Degree                                     | 32 | 84.4                | 71.9          | 45.8                    |
|                                            |    | p=0.29              | p=0.32        | p=0.82                  |
| <b>Accommodation tenure</b>                |    |                     |               |                         |
| Home owner                                 | 59 | 76.3                | 65.5          | 46.2                    |
| Rental accommodation                       | 20 | 75.0                | 80.0          | 25.0                    |
|                                            |    | p=0.91              | p=0.23        | p=0.15                  |

175

## 176 Discussion

177 In this first national study of patients with non-familial retinoblastoma diagnosed over a six-  
 178 year period to 2011 in the UK, there was no evidence of an association of ethnicity or socio-  
 179 economic status and the risk of presenting with advanced disease.

180

181 A key strength of our study is that data was extracted from a prospective retinoblastoma  
 182 database with no selection bias. In addition, we collected information on socioeconomic

183 status directly from the patients' parents to increase granularity of the data. For example,  
184 education is different from income and might help us with further interventions.  
185 Also, during this period of data collection enucleation rates were over 70% and we had  
186 information regarding high risk histopathological features. As globe salvage has increased  
187 due to new treatments (intra-arterial chemotherapy and intravitreal chemotherapy) such  
188 information is more difficult to acquire. However, the number of eyes that fall in the more  
189 advanced Groups D and E remain valid parameters to study.  
190  
191 In the US, it has recently been shown that there was a trend for Hispanics and those with  
192 unfavorable socioeconomic factors to have more advanced disease at presentation (more  
193 high risk adverse histopathology on local review). However, central review of histopathology  
194 slides did not provide evidence that this was statistically significant.<sup>11</sup> This suggests that  
195 there may have been bias at local review particularly if the name of the child was not  
196 masked from the histopathologist. From 2000 to 2010, the data from 830 children were  
197 analyzed and an association between requirement for enucleation and being Hispanic  
198 and/or low SES existed.<sup>15</sup> A retrospective analysis of the presentation of disease according  
199 IIRC (particularly groups D and E) may have been difficult to perform and the decision to  
200 enucleate was not standardized according to classification, thus bias on the part of the  
201 surgeon may have played a part. In addition, statistical significance was noted in mortality: 2  
202 of 262 white children died (99% 5-year survival) compared to 6 of 89 black children (93% 5-  
203 year survival). The causes of mortality from retinoblastoma are again complex ranging from  
204 associated pinealoblastoma to treatment strategies and poor follow-up. Unfortunately, such  
205 details were not provided in that study.  
206  
207 Human Development Index for different countries correlates with survival for  
208 retinoblastoma.<sup>16</sup> In Mexico, lower maternal education and poor prenatal housing conditions  
209 were significantly predictive of overall survival in unilateral disease, and more advanced IIRC  
210 grouping in bilateral disease, independent of diagnostic delay.<sup>17</sup> In Brazil, maternal

211 education carried a significant difference with outcomes (advanced stage at diagnosis,  
212 enucleation and survival).<sup>18</sup> Interestingly, low SES *per se* was not associated with poorer  
213 outcomes.

214

215 We have previously shown that in the UK high-risk retinoblastoma (requiring adjuvant  
216 chemotherapy) is not associated with delayed lag time (time to diagnosis).<sup>9</sup> This is  
217 counterintuitive but is found in all other paediatric cancers in high resource countries.<sup>19</sup>  
218 Whereas low SES may be associated with more advanced disease at presentation in low  
219 resource countries or countries with unequal health care access, we wanted to understand if  
220 there were any vulnerable groups in a healthcare system that was free at point of access  
221 such as the UK. We have found no evidence of an association to suggest socioeconomic  
222 status or a certain ethnic group is disadvantaged. It is also difficult to argue that any  
223 particular ethnic group (present in the UK) is biologically more susceptible to advanced  
224 disease.

225

226 Our study draws on a national sample representative of the UK population of children with  
227 non-familial Rb. Nevertheless, power to detect true differences in risk of presentation with  
228 advanced disease may have been limited by the size of the sample. An inherent limitation to  
229 studying Rb is the rarity of the disease. As we hypothesized that ethnicity and socio-  
230 economic status may be risk factors, we undertook primary data collection on  
231 person/individual level SES factors, in order to allow deeper understanding of pathways.  
232 Unfortunately, we had only a moderate response to the questionnaire survey which limited  
233 our sample size further. There were some differences that failed to reach statistical  
234 significance. For example, there was some indication that Indian/Pakistani/Bangladeshi  
235 ethnicity, and being in the lowest IMD quintile were associated with higher likelihood of D/E  
236 IIRC grade, but this was not statistically significant. This may be due to the small study  
237 population size leading to inadequate power. However, the results are similar to the findings  
238 of another high resource country (USA) that has looked at this study question.<sup>11</sup>

239

240 In summary, we report the largest cohort of patients with retinoblastoma in the UK with  
241 prospective data on ethnicity and socioeconomic status. Although, there is a trend between  
242 low SES and certain ethnic groups with advanced retinoblastoma, we have found no  
243 evidence of an association. This may reflect equality in access in primary health care. As a  
244 result, awareness campaigns highlighting the white reflex and strabismus should continue in  
245 their present format.

246

### 247 **Acknowledgments:**

248 Jugnoo Rahi is a National Institute for Health Research (NIHR) Senior Investigator. The  
249 views expressed in this article are those of the authors and not necessarily those of the  
250 NHS, the NIHR, or the Department of Health.

251

252 Research Grant from the Royal National Institute of the Blind, UK. The funding  
253 organization had no role in the design or conduct of this research.

254 Phillippa M Cumberland is funded by the Ulverscroft Foundation

255

256

257

258

259

260

261

262

263

264

265

266

267

268

269

270

271

## 272 **References:**

- 273 1. Kivela T. The epidemiological challenge of the most frequent eye cancer:  
274 retinoblastoma, an issue of birth and death. *Br J Ophthalmol.* 2009; 93: 1129–1131
- 275 2. Murphree AL. Intraocular retinoblastoma: the case for a new group classification.  
276 *Ophthalmology clinics of North America* 2005;18: 41-53
- 277 3. Shields CL, Mashayekhi A, Au AK, Czyz C, Leahey A, Meadows AT, Shields JA. The  
278 International Classification of Retinoblastoma predicts chemoreduction success.  
279 *Ophthalmology.* 2006;113(12):2276-80.
- 280 4. Fabian ID, Stacey AW, Johnson KP, et al. Primary intravenous chemotherapy for  
281 group D retinoblastoma: a 13-year retrospective analysis. *Br J Ophthalmol.*  
282 2017;101:82–8
- 283 5. Kaliki S, Srinivasan V, Gupta A, et al. Clinical features predictive of high-risk  
284 retinoblastoma in 403 Asian Indian patients: a case-control study. *Ophthalmology.*  
285 2015;122:1165–72.
- 286 6. Honavar SG, Singh AD, Shields CL, et al. Postenucleation Adjuvant Therapy in High-  
287 Risk Retinoblastoma. *Arch Ophthalmol.* 2002;120(7):923–931
- 288 7. Leander C, Fu LC, Peña A, et al. Impact of an education program on late diagnosis  
289 of retinoblastoma in Honduras. *Pediatr Blood Cancer.* 2007;49:817–9.
- 290 8. Ribeiro KC, Antoneli CB. Trends in eye Cancer mortality among children in Brazil,  
291 1980-2002. *Pediatr Blood Cancer.* 2007; 48:296–305.
- 292 9. Posner M, Jaulim A, Vasalaki M, Rantell K, Sagoo MS, Reddy MA. Lag time for  
293 retinoblastoma in the UK revisited: a retrospective analysis. *BMJ Open.* 2017;13:7
- 294 10. Chawla B, Kumar K, Singh AD. Influence of Socioeconomic and Cultural Factors on  
295 Retinoblastoma Management. *Asia-Pacific Journal of Oncology Nursing.*  
296 2017;4(3):187-190.

- 297 11. Green AL, Chintagumpala M, Krailo M, Langholz B, Albert D, Eagle R, Cockburn M,  
298 Chevez-Barrios P, Rodriguez-Galindo C. Correlation of Insurance, Race, and  
299 Ethnicity with Pathologic Risk in a Controlled Retinoblastoma Cohort: A Children's  
300 Oncology Group Study. *Ophthalmology*. 2016; 6420(16):30235-4.
- 301 12. UK Government website. Last accessed on 3 February 2019:  
302 <https://www.gov.uk/government/collections/english-indices-of-deprivation>
- 303 13. Office of National Statistics. Standard Occupational Classification 2000. Last  
304 accessed on 3 February 2019:  
305 [https://www.ons.gov.uk/methodology/classificationsandstandards/standardoccupatio](https://www.ons.gov.uk/methodology/classificationsandstandards/standardoccupationalclassificationsoc)  
306 [nalclassificationsoc](https://www.ons.gov.uk/methodology/classificationsandstandards/standardoccupationalclassificationsoc)
- 307 14. Kaliki S, Shields CL, Shah SU, et al. Postenucleation adjuvant chemotherapy with  
308 vincristine, etoposide, and carboplatin for the treatment of high-risk retinoblastoma.  
309 *Arch Ophthalmol*. 2011; 129:1422–7.
- 310 15. Truong B, Green AL, Friedrich P, Ribeiro KB, Rodriguez-Galindo C. Ethnic, Racial,  
311 and Socioeconomic Disparities in Retinoblastoma. *JAMA Pediatr*. 2015;  
312 169(12):1096-104
- 313 16. Canturk S, Qaddoumi I, Khetan V, et al. Survival of retinoblastoma in less-developed  
314 countries impact of socioeconomic and health-related indicators. *British Journal of*  
315 *Ophthalmology*. 2010;94:1432-1436
- 316 17. Ramírez-Ortiz MA, Ponce-Castañeda MV, Cabrera-Muñoz ML, Medina-Sansón A,  
317 Liu X, Orjuela MA. Diagnostic delay and sociodemographic predictors of stage at  
318 diagnosis and mortality in unilateral and bilateral retinoblastoma. *Cancer Epidemiol*  
319 *Biomarkers Prev*. 2014 May;23(5):784-92.
- 320 18. Mattosinho CCS, Grigorovski N, Lucena E, Ferman S, Soares de Moura ATM, Portes  
321 AF. Prediagnostic Intervals in Retinoblastoma: Experience at an Oncology Center in  
322 Brazil. *J Glob Oncol*. 2016;3(4):323-330.
- 323 19. Barr RD. "Delays" in diagnosis: a misleading concept, yet providing opportunities for  
324 advancing clinical care. *J Pediatr Hematol Oncol*. 2014;36:169–72.
